# Supplementary material
Source: publisher figshare collection journal article supplement (https://karger.figshare.com/ndownloader/files/27910134)
Supplement: Supplementary file 1 [file 27910134]

***Impact of Sleep Duration on Mortality and Quality of Life in Chronic Kidney Disease: Results from the 2007–2015 KNHANES***

Hyo Jin Lee,1 Nakwon Kwak,1 Yong Chul Kim,2 Sun Mi Choi,1 Jinwoo Lee,1,3 Young Sik Park,1 Chang-Hoon Lee, 1 Sang-Min Lee,1,3 Chul-Gyu Yoo,1,3 Jaeyoung Cho1,*

1Division of Pulmonary and Critical Care Medicine, Department of Internal Medicine, Seoul National University Hospital, Seoul, Republic of Korea

2Department of Internal Medicine, Seoul National University Hospital, Seoul, Republic of Korea

3Department of Internal Medicine, Seoul National University College of Medicine, Seoul, Republic of Korea

Supplemental Table 1. Univariable analysis of all-cause mortality according to sleep duration

| Characteristic | Hazard ratio (95% CI) | *P* value |
| --- | --- | --- |
| Sleep duration, h/day |  |  |
| <6 | 1.12 (0.91–1.39) | 0.273 |
| 6–8 | 1.00 (reference) | reference |
| >8 | 1.62 (1.26–2.09) | <0.0001 |
| Age, years |  | <0.0001 |
| 19–59 | 1.00 (reference) | reference |
| 60–69 | 2.35 (1.24–4.46) | 0.009 |
| 70–79 | 6.46 (3.53–11.81) | <0.0001 |
| ≥80 | 11.79 (6.38–21.79) | <0.0001 |
| Men | 1.44 (1.21–1.73) | <0.0001 |
| Body mass index, kg/m2 | 0.90 (0.87–0.92) | <0.0001 |
| CKD stage |  |  |
| Stage 3 | 1.00 (reference) | reference |
| Stage 4–5 | 1.98 (1.45–2.70) | <0.0001 |
| Former or current smoker | 1.65 (1.38–1.98) | <0.0001 |
| Education (high school or higher) | 0.74 (0.59–0.92) | 0.006 |
| Income (lowest quartile) | 1.08 (0.88–1.32) | 0.454 |
| Living with a spouse | 0.73 (0.61–0.88) | 0.001 |
| Occupation | 0.54 (0.43–0.69) | <0.0001 |
| Regular exercise | 0.54 (0.40–0.73) | <0.0001 |
| Anemia | 1.65 (1.37–1.98) | <0.0001 |
| Hypertension | 1.05 (0.86–1.28) | 0.643 |
| Diabetes | 1.30 (1.09–1.55) | 0.004 |
| Cardiovascular disease | 1.19 (0.96–1.47) | 0.117 |
| Cancer | 1.86 (1.35–2.58) | <0.0001 |
| Depression | 0.86 (0.57–1.28) | 0.453 |

Data were analyzed with Cox proportional hazard models and are presented as unadjusted hazard ratio (95% confidence interval).

CKD, chronic kidney disease; CI, confidence interval

Supplemental Table 2. Subgroup analysis of the association between sleep duration and all-cause mortality

| Subgroup | Sleep duration (h/day) | | | P for interaction |
| --- | --- | --- | --- | --- |
| <6 | 6–8 | >8 |
| Sex |  |  |  | 0.72 |
| Men (n=884) | 1.05 (0.77–1.41) | 1.00 (reference) | 1.08 (0.77–1.53) |  |
| Women (n=899) | 0.86 (0.63–1.17) | 1.00 (reference) | 1.15 (0.76–1.74) |  |
| Age, years |  |  |  | 0.07 |
| <65 (n=337) | 1.69 (0.56–5.06) | 1.00 (reference) | 2.32 (0.66–8.17) |  |
| ≥65 (n=1446) | 0.96 (0.77–1.20) | 1.00 (reference) | 1.11 (0.85–1.45) |  |
| CKD stage |  |  |  | 0.67 |
| Stage 3 (n=1677) | 1.00 (0.80–1.25) | 1.00 (reference) | 1.21 (0.92–1.60) |  |
| Stage 4–5 (n=106) | 0.83 (0.33–2.10) | 1.00 (reference) | 1.18 (0.44–3.21) |  |
| Anemia |  |  |  | 0.32 |
| Yes (n=519) | 1.00 (0.70–1.42) | 1.00 (reference) | 0.95 (0.61–1.48) |  |
| No (n=1264) | 0.93 (0.71–1.22) | 1.00 (reference) | 1.35 (0.97–1.87) |  |
| Hypertension |  |  |  | 0.65 |
| Yes (n=1303) | 1.03 (0.80–1.32) | 1.00 (reference) | 1.15 (0.85–1.55) |  |
| No (n=480) | 0.82 (0.53–1.25) | 1.00 (reference) | 1.36 (0.81–2.31) |  |
| Diabetes |  |  |  | 0.10 |
| Yes (n=785) | 1.19 (0.88–1.60) | 1.00 (reference) | 1.09 (0.76–1.55) |  |
| No (n=998) | 0.77 (0.57–1.06) | 1.00 (reference) | 1.39 (0.94–2.05) |  |
| Cardiovascular disease |  |  |  | 0.89 |
| Yes (n=367) | 0.85 (0.54–1.35) | 1.00 (reference) | 1.19 (0.69–2.06) |  |
| No (n=1416) | 1.00 (0.78–1.27) | 1.00 (reference) | 1.12 (0.83–1.51) |  |
| Cancer |  |  |  | 0.80 |
| Yes (n=117) | 1.14 (0.48–2.74) | 1.00 (reference) | 1.93 (0.70–5.30) |  |
| No (n=1666) | 0.97 (0.78–1.21) | 1.00 (reference) | 1.11 (0.84–1.45) |  |
| Depression |  |  |  | 0.63 |
| Yes (n=106) | 0.38 (0.10–1.42) | 1.00 (reference) | 1.08 (0.20–5.83) |  |
| No (n=1677) | 0.99 (0.80–1.24) | 1.00 (reference) | 1.16 (0.89–1.51) |  |

Data were analyzed with Cox proportional hazard models with adjustment for the covariates in model 4, and are presented as adjusted hazard ratio (95% confidence interval).

CKD, chronic kidney disease

Supplemental Table 3. Univariable analysis of the European Quality of Life-5 Dimensions index according to sleep duration

| Characteristic | Linear regression coefficient (95% CI) | P value |
| --- | --- | --- |
| Sleep duration, h/day |  |  |
| <6 | –0.05 (–0.08 to –0.02) | 0.001 |
| 6–8 | 0.00 (reference) | reference |
| >8 | –0.08 (–0.12 to –0.04) | <0.0001 |
| Age, years |  |  |
| 19–59 | 0.00 (reference) | reference |
| 60–69 | –0.04 (–0.09 to –0.001) | 0.043 |
| 70–79 | –0.11 (–0.15 to –0.07) | <0.0001 |
| ≥80 | –0.17 (–0.22 to –0.13) | <0.0001 |
| Men | 0.08 (0.06 to 0.10) | <0.0001 |
| Body mass index, kg/m2 | –0.002 (–0.005 to 0.002) | 0.325 |
| CKD stage |  |  |
| Stage 3 | 0.00 (reference) | reference |
| Stage 4–5 | –0.06 (–0.11 to –0.01) | 0.021 |
| Former or current smoker | 0.03 (0.004 to 0.05) | 0.02 |
| Education (high school or higher) | 0.03 (0.004 to 0.06) | 0.025 |
| Income (lowest quartile) | –0.08 (–0.10 to –0.05) | <0.0001 |
| Living with a spouse | 0.09 (0.07 to 0.12) | <0.0001 |
| Occupation | 0.12 (0.09 0.15) | <0.0001 |
| Regular exercise | 0.07 (0.03 to 0.10) | <0.0001 |
| Anemia | –0.06 (–0.08 to –0.03) | <0.0001 |
| Hypertension | 0.01 (–0.02 to 0.03) | 0.543 |
| Diabetes | –0.02 (–0.04 to 0.01) | 0.156 |
| Cardiovascular disease | –0.07 (–0.10 to –0.04) | <0.0001 |
| Cancer | –0.36 (–0.40 to –0.32) | <0.0001 |
| Depression | –0.12 (–0.17 to –0.07) | <0.0001 |

Data were analyzed with linear regression and are presented as linear regression coefficient (95% confidence interval).

CKD, chronic kidney disease; CI, confidence interval

Supplemental Table 4. Subgroup analysis of the association between sleep duration and the European Quality of Life-5 Dimensions index

| Subgroup | Sleep duration (h/day) | | | P for interaction |
| --- | --- | --- | --- | --- |
| <6 | 6–8 | >8 |
| Sex |  |  |  | 0.08 |
| Men (n=884) | 0.004 (–0.03 to 0.04) | 0.00 (reference) | –0.07 (–0.12 to –0.03) |  |
| Women (n=899) | –0.03 (–0.06 to 0.01) | 0.00 (reference) | –0.02 (–0.07 to 0.03) |  |
| Age, years |  |  |  | 0.72 |
| <65 (n=337) | –0.01 (–0.06 to 0.04) | 0.00 (reference) | –0.02 (–0.10 to 0.05) |  |
| ≥65 (n=1446) | –0.02 (–0.05 to 0.01) | 0.00 (reference) | –0.06 (–0.10 to –0.02) |  |
| CKD stage |  |  |  | 0.32 |
| Stage 3 (n=1677) | –0.01 (–0.04 to 0.01) | 0.00 (reference) | –0.05 (–0.09 to –0.02) |  |
| Stage 4–5 (n=106) | –0.10 (–0.24 to 0.05) | 0.00 (reference) | –0.01 (–0.16 to 0.14) |  |
| Anemia |  |  |  | 0.66 |
| Yes (n=519) | –0.002 (–0.05 to 0.05) | 0.00 (reference) | –0.02 (–0.08 to 0.04) |  |
| No (n=1264) | –0.01 (–0.04 to 0.01) | 0.00 (reference) | –0.06 (–0.10 to –0.02) |  |
| Hypertension |  |  |  | 0.31 |
| Yes (n=1303) | –0.03 (–0.06 to 0.001) | 0.00 (reference) | –0.05 (–0.09 to –0.01) |  |
| No (n=480) | 0.01 (–0.04 to 0.06) | 0.00 (reference) | –0.06 (–0.14 to 0.01) |  |
| Diabetes |  |  |  | 0.86 |
| Yes (n=785) | –0.02 (–0.06 to 0.02) | 0.00 (reference) | –0.06 (–0.11 to –0.01) |  |
| No (n=998) | –0.01 (–0.04 to 0.03) | 0.00 (reference) | –0.04 (–0.08 to 0.01) |  |
| Cardiovascular disease |  |  |  | 0.42 |
| Yes (n=367) | –0.01 (–0.07 to 0.06) | 0.00 (reference) | –0.08 (–0.16 to 0.004) |  |
| No (n=1416) | –0.02 (–0.04 to 0.01) | 0.00 (reference) | –0.04 (–0.07 to –0.001) |  |
| Cancer |  |  |  | <0.001 |
| Yes (n=117) | 0.17 (–0.0003 to 0.35) | 0.00 (reference) | 0.02 (–0.18 to 0.23) |  |
| No (n=1666) | –0.03 (–0.06 to –0.01) | 0.00 (reference) | –0.05 (–0.08 to –0.02) |  |
| Depression |  |  |  | 0.76 |
| Yes (n=106) | –0.04 (–0.15 to 0.06) | 0.00 (reference) | 0.01 (–0.15 to 0.18) |  |
| No (n=1677) | –0.01 (–0.04 to 0.01) | 0.00 (reference) | –0.05 (–0.08 to –0.02) |  |

Data were analyzed with linear regression with adjustment for the covariates in model 4, and are presented as linear regression coefficient (95% confidence interval).

CKD, chronic kidney disease
